# Supplementary material for: Detection of Developmental Asexual Stage-Specific RNA Editing Events in Plasmodium falciparum 3D7 Malaria Parasite
Source: MDPI journal article supplement (doi:10.3390/microorganisms12010137), 2024-01-10
Supplement: s1 [file s1]

CLUSTAL O(1.2.4) multiple sequence alignment of 28S rRNA genes

```

PF3D7_0532000,28S      -GTTTGATTTGATGTTAGGAGGGCAAATCCGCCGAATTTAAGCATATAATTAAGCGGAAG
    59
PF3D7_0726000,28S      -GTTTGATTTGATGTTAGGAGGGCAAATCCGCCGAATTTAAGCATATAATTAAGCGGAAG
    59
PF3D7_0112700,         -----TAGGAGGGCAAATCCGCTGAACCTAAGCATATAATTAAGCGGAAG
    45
PF3D7_1148640,         --TTTGATTTGATGTTAGGAAGGCAAATCCGCCGAATTTAAGCATATAATTAAGCGGAAG
    58
PF3D7_1371300,         TATTTGATTTGATGTTAGGAAGGCAAATCCGCCGAATTTAAGCATATAATTAAGCGGAAG
    60
                        *****
PF3D7_0532000,28S      AAAAGAAAATAACTATGATTCCTTTAGTAACGGCGAGTGAACAAGGACCAGCTCAAACGG
    119
PF3D7_0726000,28S      AAAAGAAAATAACTATGATTCCTTTAGTAACGGCGAGTGAACAAGGACCAGCTCAAACGG
    119
PF3D7_0112700,         AAAAGAAAATAACTATGATTCCTTTAGTAACGGCGAGTGAAGAAGGAATAGCTCAATAAG
    105
PF3D7_1148640,         AAAAGAAAATAACAATGATTTCTTTAGTAACGGCGAGTGAACAAGAAAAGCTCAAGGAG
    118
PF3D7_1371300,         AAAAGAAAATAACAATGATTTCTTTAGTAACGGCGAGTGAACAAGAAAAGCTCAAGGAG
    120
                        *****
PF3D7_0532000,28S      TTAATCCTTCGTTTGGTGCAAACATTTTCGACGG-----AATTGT
    158
PF3D7_0726000,28S      TTAATCCTTCGTTTGGTGCAAACCTTTTCGACGG-----AATTGT
    158
PF3D7_0112700,         TAGAATCCTTCGAATCTTAATGATATATTTATACATAGAATAAAGAATTGAAGGAATTGT
    165
PF3D7_1148640,         ATAATTCTATATCGTAGTTGTAAAAAGACTATGTGTATAGAAATTGTTCTGTT--ATAAG
    176
PF3D7_1371300,         ATAATTCTATATCGTAGTTGTAAAAAGACTATGTGTATAGAAATTGTTCTGTT--ATAAG
    178
                        *      *
PF3D7_0532000,28S      C--GTTGAATT-----ATTCCATGAATGCCTTTAATTTTGAGCAAAGTGAGCAG
    205
PF3D7_0726000,28S      C--GTTGAATT-----ATTCCATGAATGCCTTTAAT-TTGAGCAAAGTGAGCAG
    204
PF3D7_0112700,         CAAGTTGAATTGTACTCTTGTAGGCCTCACAGGTGAAATGAATATATAGAAGTAAAGTAG
    225
PF3D7_1148640,         GAAGAAGTAATCTGAGAATATATGGGATTTATATATATATTTAGTTATCGAAATAAGTAG
    236
PF3D7_1371300,         GAAGAAGTAATCTGAGAATATATGGGATTTATATATATATTTAGTTATCGAAATAAGTAG
    238
                        *      *      *      *      *      *
PF3D7_0532000,28S      GAATGCTTCCCCATAGAGGGTGAAAGGCCCATAGTTCCTTTTAA-----TTT
    252
PF3D7_0726000,28S      GAATGCTTCCCCATAGAGGGTGAAAGGCCCATAGTTCCTTTTAA-----TTT
    251
PF3D7_0112700,         GAATACTTCCTCATAGAGGGTGAAAGGCCCGTATCATATAT-----CATTTCTGTTGGC
    278
PF3D7_1148640,         GAATACTTTCCCATAGAGGGTGAAAGGCCCGTAGTTAATAAATATATAAAGTTCTTTTTT
    296
PF3D7_1371300,         GAATACTTTCCCATAGAGGGTGAAAGGCCCGTAGTTAATAAATATATAAAGTTCTTTTTT
    298
                        **** *

```

|                          |                                                                                                                                                                                                       |
|--------------------------|-------------------------------------------------------------------------------------------------------------------------------------------------------------------------------------------------------|
| PF3D7_0532000,28S<br>312 | ATTCATTGGAATTTTTCATGCCGAGTCGTGTTCTTTGAGATTGGAGCACTAATACGTGTG                                                                                                                                          |
| PF3D7_0726000,28S<br>311 | ATTCATTGGAATTTTTCATGTCGAGTCGTGTTCTTTGAGATTGGAGCACTAATACGTGTG                                                                                                                                          |
| PF3D7_0112700,<br>338    | TTTGAGTATTTATATTTTACTGAGTAGTGTCTTTGAGATTGGAGCACAATTTGGTGTG                                                                                                                                            |
| PF3D7_1148640,<br>356    | TTTGATAATTTTTTTTTTTAAAGAGTAGTGCTCTTTGAGATTGGAGTACAAAGATGTGTG                                                                                                                                          |
| PF3D7_1371300,<br>358    | TTTGATAATTTTTTTTTTTAAAGAGTAGTGCTCTTTGAGATTGGAGTACAAAGATGTGTG                                                                                                                                          |
|                          | <div style="display: flex; justify-content: space-between; width: 100%;"> <span>**</span> <span>* * * *</span> <span>**** ** *</span> <span>*****</span> <span>* * *</span> <span>*****</span> </div> |
| PF3D7_0532000,28S<br>372 | ATACATTTACATAAAAGCTAAATATGTGTAGGAGACCGATAGCAAACAAGTACCGTGAGG                                                                                                                                          |
| PF3D7_0726000,28S<br>371 | ATACATTTACATAAAAGCTAAATATATGTAGGAGACCGATAGCAAACAAGTACCGTGAGG                                                                                                                                          |
| PF3D7_0112700,<br>398    | ATACATTTACATAAAAGCTAAATATGTACAGGAGACCGATAGCGAACAAGTACCGTGAGG                                                                                                                                          |
| PF3D7_1148640,<br>416    | ATACATTTACATAAAGGCTAAATATATATAGGAGACCGATAGGAAACAAGTACCGTGAGG                                                                                                                                          |
| PF3D7_1371300,<br>418    | ATACATTTACATAAAGGCTAAATATATATAGGAGACCGATAGGAAACAAGTACCGTGAGG                                                                                                                                          |
|                          | ***** * *                                                                                                                                                                                             |
| PF3D7_0532000,28S<br>432 | GAAAGATGAAATAGTACTCAGGAATGAGCAATTAAATAGTACCTGAAATCGTTAAGATGG                                                                                                                                          |
| PF3D7_0726000,28S<br>431 | GAAAGATGAAATAGTACTCAGGAATGAGCAATTAAATAGTACCTGAAATCGTTAAGATGG                                                                                                                                          |
| PF3D7_0112700,<br>458    | GAAAGATGAAATAGTACTCAGGAATGAGCAATTAAATAGTACCTGAAATCGTTAAGATGG                                                                                                                                          |
| PF3D7_1148640,<br>476    | GAAAGATGAAATAGTACTCAGGAATGAGCAGTTAAATAGTACCTGAAATCGTTAAGGTGG                                                                                                                                          |
| PF3D7_1371300,<br>478    | GAAAGATGAAATAGTACTCAGGAATGAGCAGTTAAATAGTACCTGAAATCGTTAAGGTGG                                                                                                                                          |
|                          | ***** *                                                                                                                                                                                               |
| PF3D7_0532000,28S<br>486 | AACGGATTAAGAGAGAAAACAAGTAAAGAGGGGAATTTTAAATTTTTTTTGTTA-----                                                                                                                                           |
| PF3D7_0726000,28S<br>485 | AACGGATTAAGAGAGAAAACAAGTAAAGAGGGGAATTTTAAATTTTTTTTGTTA-----                                                                                                                                           |
| PF3D7_0112700,<br>518    | AACGGATTAAGAGAGAAAACAAGTAAAGAGGAGAATTTTACATTTTATTTTTGTTTT                                                                                                                                             |
| PF3D7_1148640,<br>536    | AACGGATTAAGAAAGGAAAATGTAAGAAGATAGTAAATATTACTCGGCGAGTTTTATTAA                                                                                                                                          |
| PF3D7_1371300,<br>538    | AACGGATTAAGAAAGGAAAATGTAAGAAGATAGTAAATATTACTCGGCGAGTTTTATTAA                                                                                                                                          |
|                          | ***** ** *** * * * * *                                                                                                                                                                                |
| PF3D7_0532000,28S<br>535 | -TAATTCTCTTCTTTATTAAAAGAAACATCAGTGATTAATTTAATTTCAA-----                                                                                                                                               |
| PF3D7_0726000,28S<br>534 | -TAATTCTCTTCTTTATTAAAAGAAACATCAGTGATTAATTTAATTTCAA-----                                                                                                                                               |
| PF3D7_0112700,<br>564    | ATAATTCTCTTCTTTATTAAAAGAAACATCAGTGATTAATTT-----AATT-                                                                                                                                                  |
| PF3D7_1148640,<br>595    | GATACG-ATTTTTTTTATAAAAAGAAACATGAGTGAACGAGAATAAATTATAATATAATTA                                                                                                                                         |
| PF3D7_1371300,<br>597    | GATACG-ATTTTTTTTATAAAAAGAAACATGAGTGAACGAGAATAAATTATAATATAATTA                                                                                                                                         |
|                          | * ** ***** ***** *                                                                                                                                                                                    |
| PF3D7_0532000,28S<br>542 | -----TAAAGCA                                                                                                                                                                                          |

```
PF3D7_0726000,28S -----TAAAGCA
541
PF3D7_0112700, -----TCAA-----TAAAGCA
575
PF3D7_1148640, TATTAGATAGGTATAGAATAGATACACAGGACTAAGGGGGGAGGAGTAGTAAGAAAAAGG
655
PF3D7_1371300, TATTAGATAGGTATAGAATAGATACACAGGACTAAGGGGGGAGGAGTAGTAAGAAAAAGG
657
```

\*\*\*

```
PF3D7_0532000,28S ATCCCTGA-----AATTCAAAATTTCTTTTAATTTTGT
576
PF3D7_0726000,28S ATCCCTGA-----AATTCAAAATTTCTTTTAATTTTGT
575
PF3D7_0112700, ATCCCTGA-----AATTCAAAATTTCTTTTAATTTTGT
609
PF3D7_1148640, GTGCAGTGTAAGGGTTATGCTTGTATGTTTGAGTATTCAGTCTCTTTTTTTTTTTT
715
PF3D7_1371300, GTGCAGTGTAAGGGTTATGCTTGTATGTTTGAGTATTCAGTCTCTTTTTTTTTTTT
717
```

\* \* \* \* \* \* \* \* \* \*

```
PF3D7_0532000,28S TTTCACCTTCTCCCCGC-----ACTAATGTGGGGA
606
PF3D7_0726000,28S TTTCACCTTCTCCCCGC-----ACTAATGTGGGGA
605
PF3D7_0112700, TTTCACCTTCTC-CCCG-----CACTAA---TGTGGGGA
639
PF3D7_1148640, TCTGTAATTTTATATCTATTTAATTAAAGTATCCTTAGCTAATAATAATTTATGAAGGAA
775
PF3D7_1371300, TCTGTAATTTTATATCTATTTAATTAAAGTATCCTTAGCTAATAATAATTTATGAAGGAA
777
```

\* \* \* \* \*

```
PF3D7_0532000,28S AAAGTGGCTTTATTT-----
621
PF3D7_0726000,28S AAAGTGGCTTTATTT-----
620
PF3D7_0112700, AAAGTGGCTTTATTT-----
654
PF3D7_1148640, GAAGTTAATTTATATGAGTTTTAAAGGCATGATTATATTGTATATTATATGATATATAT
835
PF3D7_1371300, GAAGTTAATTTATATGAGTTTTAAAGGCATGATTATATTGTATATTATATGATATATAT
837
```

\*\*\*\* \* \* \* \*

```
PF3D7_0532000,28S -----CTTCAATTATTTTTTTTGTGAGGAATTT-----
651
PF3D7_0726000,28S -----CTTCAATTATTTTTTTTGTGAGGAATTT-----
650
PF3D7_0112700, -----CTTCAATTATTTTTTTTGTGAGGAATTT-----
684
PF3D7_1148640, ATAATTATGTTTTAACCAGAAATGCGTATAATTATTCTGTTTACTGAGGAAAGAGGTAAAC
895
PF3D7_1371300, ATAATTATGTTTTAACCAGAAATGCGTATAATTATTCTGTTTACTGAGGAAAGAGGTAAAC
897
```

\* \* \* \* \*

```
PF3D7_0532000,28S -----AAAATTATTTGAATTTTCTTCTTATAATTTAAGTTGTTTCTATTCAG
699
PF3D7_0726000,28S -----AAAATTATTTGAATTTTCTTCTTATAATTTAAGTTGTTTCTATACAG
698
```

|                          |                                                                        |
|--------------------------|------------------------------------------------------------------------|
| PF3D7_0112700,<br>732    | -----AAAATTATTTGAATTTTTCTTCTTATAATTTAAGTTGTTTCTATATAG                  |
| PF3D7_1148640,<br>955    | AATAGTGTGAAC TAAGAATGGGATATTTCTTTTTCTGATTGTAAGTTGTTTTAAATAG            |
| PF3D7_1371300,<br>957    | AATAGTGTGAAC TAAGAATGGGATATTTCTTTTTCTGATTGTAAGTTGTTTTAAATAG            |
|                          | **                  **** * * * *   * * ***** ** **                     |
| PF3D7_0532000,28S<br>759 | TACTTTCTTAACCCACTCGTCTTGAAACACGGACCAAGGAGTCTAGCAAATGTGCAAGTG           |
| PF3D7_0726000,28S<br>758 | TACTTTCTTAACCCACTCGTCTTGAAACACGGACCAAGGAGTCTAGCAAATGTGCAAGTG           |
| PF3D7_0112700,<br>792    | TACTTTCTTAACCCACTCGTCTTGAAACACGGACCAAGGAGTCTAGCAAATGTGCAAGTG           |
| PF3D7_1148640,<br>1015   | TACTTTTTTAACCCACTCGTCTTGAAACACGGACCAAGGAGTCTAACAAATGTGCGAGCG           |
| PF3D7_1371300,<br>1017   | TACTTTTTTAACCCACTCGTCTTGAAACACGGACCAAGGAGTCTAACAAATGTGCGAGCG           |
|                          | ***** *****                                                            |
| PF3D7_0532000,28S<br>815 | TATATGATTCTTTAAACATTTCTCTT----TTTAATATACGCATAATTAATGTAATATGT           |
| PF3D7_0726000,28S<br>814 | TATATGATTCTTTAAACATTTCTCTT----TTTAATATACGCATAATTAATGTAATATGT           |
| PF3D7_0112700,<br>848    | TATATGATTCTTTAAACATTTCTCTT----TTTAATATACGCATAATTAATGTAATATGT           |
| PF3D7_1148640,<br>1075   | TATGTGATATGAATAAAAACATATATAAATTTTGTAGTTACGCGTAATTAATGTGAATTTT          |
| PF3D7_1371300,<br>1077   | TATGTGATATGAATAAAAACATATATAAATTTTGTAGTTACGCGTAATTAATGTGAATTTT          |
|                          | *** ****       ** *       *       *** *       ***** ***** * * *        |
| PF3D7_0532000,28S<br>875 | TTCTTTATTGTAGATTTGTGTGGTGTTTAATTTTTATTAAATCCCCACTTTGCATACAAT           |
| PF3D7_0726000,28S<br>873 | TTTCTTTAT-TGTAGATTTGTGTGGTGTTTAATTTTTATTAAATCCCCACTTTGCATACAAT         |
| PF3D7_0112700,<br>906    | TTCTTTATTGTAGA--TTTGTGGTGTTTAATTTTTATTAAATCCCCACTTTGCATACAAT           |
| PF3D7_1148640,<br>1125   | TTGTGGATG-----CGCCGGA-CAATAGTGCATTTGGTTTCTGGCTTGCAAACAAT               |
| PF3D7_1371300,<br>1127   | TTGTGGATG-----CGCCGGA-CAATAGTGCATTTGGTTTCTGGCTTGCAAACAAT               |
|                          | **                   *   *       *   *   ***   *   *       ***** ***** |
| PF3D7_0532000,28S<br>927 | -----ACCGGTAAGCAATTATGCTTTATTGAGTACGAGCATATTTGGTAGGACCCGA              |
| PF3D7_0726000,28S<br>925 | -----ACCGGTAAGCAATTATGCTTTATTGAGTACGAGCATATTTGGTAGGACCCGA              |
| PF3D7_0112700,<br>958    | -----ACCGGTAAGCAATTATGCTTTATTGAGTACGAGCATATTTGGTAGGACCCGA              |
| PF3D7_1148640,<br>1185   | ACCGATAAGCAATAAGATAATTAAGTTTATTGAGTATGAGTACATTTGTTAGGACCCGA            |
| PF3D7_1371300,<br>1187   | ACCGATAAGCAATAAGATAATTAAGTTTATTGAGTATGAGTACATTTGTTAGGACCCGA            |
|                          | *       *       ***** * * *       ***** *****                          |
| PF3D7_0532000,28S<br>987 | GAGGCTTTGAACTAAGCGTGATGAGATTGAAGTCAGACGAAAGTCTGATGGAGGATCGAG           |
| PF3D7_0726000,28S<br>985 | GAGGCTTTGAACTAAGCGTGATGAGATTGAAGTCAGACGAAAGTCTGATGGAGGATCGAG           |
| PF3D7_0112700,<br>1018   | GAGGCTTTGAACTAAGCGTGATGAGATTGAAGTCAGGCGAAAGTCTGATGGAGGATCGAG           |

|                           |                                                               |
|---------------------------|---------------------------------------------------------------|
| PF3D7_1148640,<br>1245    | GAGGCTTTGAACTAAGCGTGATGAGATTGAAGTCAGACGAAAGTCTGATGGAGGATCGAG  |
| PF3D7_1371300,<br>1247    | GAGGCTTTGAACTAAGCGTGATGAGATTGAAGTCAGACGAAAGTCTGATGGAGGATCGAG  |
|                           | *****                                                         |
| PF3D7_0532000,28S<br>1047 | TTGATACTGACGTGCAAATCGTTCATTTCAATCACGTTTAGGGGCGAAAGACTAATCGAA  |
| PF3D7_0726000,28S<br>1045 | TTGATACTGACGTGCAAATCGTTCATTTCAATCACGTTTAGGGGCGAAAGACTAATCGAA  |
| PF3D7_0112700,<br>1078    | TTGATACTGACGTGCAAATCGTTCATTTCAATCACGTTTAGGGGCGAAAGACTAATCGAA  |
| PF3D7_1148640,<br>1305    | TTGATACTGACGTGCAAATCGTTCATTACAATCACGTTTAGGGGCGAAAGACTAATCGAA  |
| PF3D7_1371300,<br>1307    | TTGATACTGACGTGCAAATCGTTCATTACAATCACGTTTAGGGGCGAAAGACTAATCGAA  |
|                           | *****                                                         |
| PF3D7_0532000,28S<br>1105 | AAGCCTATTAGCTGGTTATTTTCGAAAGATCTCTCAGGATCGCTGGAGTTGATTA--ATA  |
| PF3D7_0726000,28S<br>1103 | AAGCCTATTAGCTGGTTATTTTCGAAAGATCTCTCAGGATCGCTGGAGTTGATTA--ATA  |
| PF3D7_0112700,<br>1136    | AAGCCTATTAGCTGGTTATTTTCGAAAGATCTCTCAGGATCGCTGGAGTTGATTA--ATA  |
| PF3D7_1148640,<br>1365    | AAGCCTATTAGCTGGTTATTTTCGAAAGATCTCTCAGGATCGCTGGAGTTGAGTTGATTA  |
| PF3D7_1371300,<br>1367    | AAGCCTATTAGCTGGTTATTTTCGAAAGATCTCTCAGGATCGCTGGAGTTGAGTTGATTA  |
|                           | ***** *                                                       |
| PF3D7_0532000,28S<br>1164 | TAATTTTACCAGGTAGAGATAATGATTAGAGGAATCAGGGAAAT-CGTTTTCTTGACCT   |
| PF3D7_0726000,28S<br>1162 | TAATTTTACCAGGTAGAGATAATGATTAGAGGAATCAGGGAAAT-CGTTTTCTTGACCT   |
| PF3D7_0112700,<br>1196    | TAATTTTACCAGGTAGAGATAATGATTAGAGGATTTAGGGAAATGAATTTCTTAACTT    |
| PF3D7_1148640,<br>1425    | TAATTTTATAAGGTAGAGACAATGATTAGAGGGTTTAGGGGATTAAATATTTCTTAACTT  |
| PF3D7_1371300,<br>1427    | TAATTTTATAAGGTAGAGACAATGATTAGAGGGTTTAGGGGATTAAATATTTCTTAACTT  |
|                           | ***** ***** * * * * *                                         |
| PF3D7_0532000,28S<br>1221 | ATTCTCAAACCTCCCAATAGGTAAAAAGGGCGAAATAACTCAACTTTGTATT---TCACTC |
| PF3D7_0726000,28S<br>1218 | ATTCTCAAACCTCCCAATAGGTAAAAAGGGCGAAATAACTCAA-TTTGTATT---TCACTC |
| PF3D7_0112700,<br>1256    | ATTCTCAAACCTTCCAATATGTAAAAAGGGTGATATATCTGAATTGTGTGATTTCACCTCT |
| PF3D7_1148640,<br>1481    | ATTCTCAAACCTTCCAATATGTAAAGAGGGTGCGATATCTGAAAAG----TATTTCACTTT |
| PF3D7_1371300,<br>1483    | ATTCTCAAACCTTCCAATATGTAAAGAGGGTGCGATATCTGAAAAG----TATTTCACTTT |
|                           | ***** ***** * * * * *                                         |
| PF3D7_0532000,28S<br>1281 | ATATTAAATAAAATAACTCCAAGTGGGCCATTTTTGGTAAGCAGAACTGGCGATGAGGGA  |
| PF3D7_0726000,28S<br>1278 | ATATTAAATAAAATAACTCCAAGTGGGCCATTTTTGGTAAGCAGAACTGGCGATGAGGGA  |
| PF3D7_0112700,<br>1316    | GTTTTAAATAAAATAACTCCAAGTGGGCCATTTTTGGTAAGCAGAACTGGCGATGAGGGA  |
| PF3D7_1148640,<br>1541    | GGCGTAAATAAGATAACTCCAAGTGGGCCATTTTTGGTAAGCAGAACTGGCGATGAGGGA  |

|                           |                                                                            |
|---------------------------|----------------------------------------------------------------------------|
| PF3D7_1371300,<br>1543    | GGCGTAAATAAGATAAACTCCAAGTGGGCCATTTTTGGTAAGCAGAACTGGCGATGAGGGA<br><br>***** |
| PF3D7_0532000,28S<br>1340 | TGCTCCTAACGCTTGGATAAGGTGCCTAA-ATATTCGCTCATGAGATCCCATAAAAGGTG               |
| PF3D7_0726000,28S<br>1337 | TGCTCCTAACGCTTGGATAAGGTGCCTAA-ATATTCGCTCATGAGATCCCATAAAAGGTG               |
| PF3D7_0112700,<br>1376    | TGCTCCTAACGCTTGGATAAGGTGCCTAAATTATTCGCTCATGAGATCCCATAAAAGGTG               |
| PF3D7_1148640,<br>1600    | TGCTCCTAACGCTTGGATAAGGTGCCTAA-ATATTCGCTCATGAGATCCCATAAAAGGTG               |
| PF3D7_1371300,<br>1602    | TGCTCCTAACGCTTGGATAAGGTGCCTAA-ATATTCGCTCATGAGATCCCATAAAAGGTG<br><br>*****  |
| PF3D7_0532000,28S<br>1400 | TTGGTTCATAATGACAGTAGGACGGTGGTCATGGAAGTCGAAATCCGCTAAGGAGTGTGT               |
| PF3D7_0726000,28S<br>1397 | TTGGTTCATAATGACAGTAGGACGGTGGTCATGGAAGTCGAAATCCGCTAAGGAGTGTGT               |
| PF3D7_0112700,<br>1436    | TTGGTTCATAATGACAGTAGGACGATGGTCATGGAAGTCGAAATTCGCTTAGGAGTGTGT               |
| PF3D7_1148640,<br>1660    | TTGGTTCATAATGACAGTAGGACGATGGTCATGGAAGTCGAAATTCGCTTAGGAGTGTGT               |
| PF3D7_1371300,<br>1662    | TTGGTTCATAATGACAGTAGGACGATGGTCATGGAAGTCGAAATTCGCTTAGGAGTGTGT<br><br>*****  |
| PF3D7_0532000,28S<br>1460 | AACAACCTCACCTACCGAATGAACTAGCCCTGAAAATGGATGGCGCTAAAGCGGATTACCG              |
| PF3D7_0726000,28S<br>1457 | AACAACCTCACCTACCGAATGAACTAGCCCTGAAAATGGATGGCGCTAAAGCGGATTACCG              |
| PF3D7_0112700,<br>1496    | AACAACCTCACCTACCGAATGAACTAGCCCTGAAAATGGATGGCGCTAAAGCGAATTACCG              |
| PF3D7_1148640,<br>1720    | AACAACCTCACCTACCGAATGAACTAGCCCTGAAAATGGATGGCGCTAAAGCGAATTACCG              |
| PF3D7_1371300,<br>1722    | AACAACCTCACCTACCGAATGAACTAGCCCTGAAAATGGATGGCGCTAAAGCGAATTACCG<br><br>***** |
| PF3D7_0532000,28S<br>1518 | ATACCAAGCCATAAAAAGAACAGAAAAA--ATTTATTTTTTTTTTAGAATCTTTTTATGA               |
| PF3D7_0726000,28S<br>1515 | ATACCAAGCCATAAAAAGAACAGAAAAA--ATTTATTTTTTTTTTAGAATCTTTTTATGA               |
| PF3D7_0112700,<br>1556    | ATACCAGGCCATAAAAAGGTAGGAATTAAAATTTTAAATTACCTCAGATCTTTTTATGA                |
| PF3D7_1148640,<br>1780    | ATACCGGGCCATAAGAAGGTAGAAAATTATAAATGTTAATTTAGCTCAGATCTTTTTATGA              |
| PF3D7_1371300,<br>1782    | ATACCGGGCCATAAGAAGGTAGAAAATTATAAATGTTAATTTAGCTCAGATCTTTTTATGA<br><br>***** |
| PF3D7_0532000,28S<br>1578 | GTAGAAAATCGTGGGGTTTGTGTTGAAGCGAAATACGTGAGTTTTTCGTGGAACATCTCCC              |
| PF3D7_0726000,28S<br>1575 | GTAGAAAATCGTGGGGTTTGTGTTGAAGCGAAATACGTGAGTTTTTCGTGGAACATCTCCC              |
| PF3D7_0112700,<br>1616    | GTAGAAAATCGTGGGGTTTGTGTTGAAGCGAAATACGTGAGTTTTTCGTGGAACATCTCCC              |
| PF3D7_1148640,<br>1840    | GTAGAAAATCGTGGGGTTTGTGTTGAAGCGAAATACGTGAGTTTTTCGTGGAACATCTCCC              |
| PF3D7_1371300,<br>1842    | GTAGAAAATCGTGGGGTTTGTGTTGAAGCGAAATACGTGAGTTTTTCGTGGAACATCTCCC<br><br>***** |

|                              |                                                               |
|------------------------------|---------------------------------------------------------------|
| PF3D7_0532000,28S<br>1638    | TAGTGCAGATCTTGGTGGAAGTAGCAACTATTCAAATGAGAACTTTGAAGACTGAAGTGG  |
| PF3D7_0726000,28S<br>1635    | TAGTGCAGATCTTGGTGGAAGTAGCAACTATTCAAATGAGAACTTTGAAGACTGAAGTGG  |
| PF3D7_0112700,<br>1676       | TAGTGCAGATCTTGGTGGAAGTAGCAACTATTCAAATGAGAACTTTGAAGACTGAAGTGG  |
| PF3D7_1148640,<br>1900       | TAGTGCAGATCTTGGTGGAAGTAGCAACTATTCAAATGAGAACTTTGAAGACTGAAGTGG  |
| PF3D7_1371300,<br>1902       | TAGTGCAGATCTTGGTGGAAGTAGCAACTATTCAAATGAGAACTTTGAAGACTGAAGTGG  |
| *****                        |                                                               |
| PF3D7_0532000,28S<br>1698    | AGAAGGGTTTCTTGTCAACTGTGATTGAACAAGAGTTAGCCGCTCCTAAGGGATAGCTGA  |
| PF3D7_0726000,28S<br>1695    | AGAAGGGTTTCTTGTCAACTGTGATTGAACAAGAGTTAGCCGCTCCTAAGGGATAGCTGA  |
| PF3D7_0112700,<br>1736       | AGAAGGGTTTCTTGTCAACTGTGATTGAACAAGAGTTAGCCGCTCCTAAGGGATAGCTGA  |
| PF3D7_1148640,<br>1960       | AGAAGGGTTTCTTGTCAACTATGTTTGTACAAGAGTTAGCCACTCCTAAGGGATAGCTGA  |
| PF3D7_1371300,<br>1962       | AGAAGGGTTTCTTGTCAACTATGTTTGTACAAGAGTTAGCCACTCCTAAGGGATAGCTGA  |
| ***** ** *** *****           |                                                               |
| PF3D7_0532000,28S<br>1733    | AAAGTGTTTAAAG-GGGTTCCT-----TCCCCGTCTCAAA                      |
| PF3D7_0726000,28S<br>1731    | AAAGTGTTTAAAGGGGGTTCCT-----TCCCCGTCTCAAA                      |
| PF3D7_0112700,<br>1794       | AAAGTGTTTAAAGAAGAAATTCATTATAAGAAT--TATATAATGAACTTCATCTCGAA    |
| PF3D7_1148640,<br>2020       | AAAGTGTTTAAAGAAGTAAGATATTATATGGAAATATATAATTAGATCTTCGTCTCAAA   |
| PF3D7_1371300,<br>2022       | AAAGTGTTTAAAGAAGTAAGATATTATATGGAAATATATAATTAGATCTTCGTCTCAAA   |
| ***** * * * * *              |                                                               |
| PF3D7_0532000,28S<br>1785    | AGGGAAACAGGTTGATATTCCCTGTGCCAATAGTATTA-----TGAGTTTCTTAGATG    |
| PF3D7_0726000,28S<br>1783    | AGGGAAACAGGTTGATATTCCCTGTGCCAATAGTATTA-----TGAGTTTCTTAGATG    |
| PF3D7_0112700,<br>1849       | AGGGAAACAGGTTAATATTCCCTGTGCCATAAGTAATA----AGAGTGCAAACAGAGATG  |
| PF3D7_1148640,<br>2080       | AGGGAAACAGGTTAATATTCCCTGTGCCAAATAGAAGTAAGGGTGTGAATAAAGAAAGATG |
| PF3D7_1371300,<br>2082       | AGGGAAACAGGTTAATATTCCCTGTGCCAAATAGAAGTAAGGGTGTGAATAAAGAAAGATG |
| ***** * *****                |                                                               |
| PF3D7_0532000,28S<br>1845    | GTAACATATATATAAATGAACTCCTTTACATAGGCTTTTACACTCGGGGTGCGTTTCTTT  |
| PF3D7_0726000,28S<br>1843    | GTAACATATATATAAATGAACTCCTTTACATAGGCTTTTACACTCGGGGTGCGTTTCTTT  |
| PF3D7_0112700,<br>1909       | GTAACATACATATAAATGAACTCCTTAACATAGATTTTACTCATGGGGTGCGTTATCTTT  |
| PF3D7_1148640,<br>2140       | GTAACATACATACAAATGAACTCCTTGACATAGGTTTACGCTCGGGGTGCGTTATCTTT   |
| PF3D7_1371300,<br>2142       | GTAACATACATACAAATGAACTCCTTGACATAGGTTTACGCTCGGGGTGCGTTATCTTT   |
| ***** ** ***** ***** * ***** |                                                               |
| PF3D7_0532000,28S<br>1905    | GCACTTTACCTTTATAACAAACCTTGGAATCAATTTACTTGAGAGAAGGGTTCGTTGAAC  |

|                           |                                                                        |
|---------------------------|------------------------------------------------------------------------|
| PF3D7_0726000,28S<br>1903 | GCACTTTACCTTTATAACAAACCTTGAATCAATTTACTTGGAGAAGAGGTTGCGTTGAAC           |
| PF3D7_0112700,<br>1969    | GCACTTTAATTTTATAACAAACCTTGAATCAATTTATTTGGAGAAGAGGTTGCGTTGAAC           |
| PF3D7_1148640,<br>2200    | GCACTTTAATTTTATAGCAAACCTTGAATCAATTTATTTGGAGAAGAGGTTTGTGTAAC            |
| PF3D7_1371300,<br>2202    | GCACTTTAATTTTATAGCAAACCTTGAATCAATTTATTTGGAGAAGAGGTTTGTGTAAC            |
|                           | *****      *****      *****      *****      *****                      |
| PF3D7_0532000,28S<br>1943 | TCAATTCAAAAAATTTCTTGAACGGGGTTT-----TCGGATTC                            |
| PF3D7_0726000,28S<br>1941 | TCAATTCAAAAAATTTCTTGAACGGGGTTT-----TCGGATTC                            |
| PF3D7_0112700,<br>2029    | TCAATTCAAAAAAAAAAAAAAAAAAAAAAATTAATTATAGAAGGAAAGGATTTTCGGATCC          |
| PF3D7_1148640,<br>2236    | TCAATTCAAAAAATTTATGGCTGGGTTT-----TCGGATTC                              |
| PF3D7_1371300,<br>2238    | TCAATTCAAAAAATTTATGGCTGGGTTT-----TCGGATTC                              |
|                           | *****      *****                                                       |
| PF3D7_0532000,28S<br>1982 | AGTTCA-----TTTTATTTTTTGTGTTTGTAGCAATAGTAATTCG-                         |
| PF3D7_0726000,28S<br>1980 | AGTTCA-----TTTTATTTTTTGTGTTTGTAGCAATAGTAATTCG-                         |
| PF3D7_0112700,<br>2089    | TTTGTACTTTTTTTTTTTTTTTTTTTTTTTTTTATGTTTGTAGCAATAGTAATTCAT              |
| PF3D7_1148640,<br>2275    | AGTTCA-----TTTTATTTTTTGTGTTTGTAGCAATAGTAATTCG-                         |
| PF3D7_1371300,<br>2277    | AGTTCA-----TTTTATTTTTTGTGTTTGTAGCAATAGTAATTCG-                         |
|                           | *      *      ****      *****                                          |
| PF3D7_0532000,28S<br>2042 | TTTTTATGAATTATCCGAAGTGGTAAGGACTATCCTTGAAAAAAGGAGGGAACGGCTTTG           |
| PF3D7_0726000,28S<br>2040 | TTTTTATGAATTATCCGAAGTGGTAAGGACTATCCTTGAAAAAAGGAGGGAACGGCTTTG           |
| PF3D7_0112700,<br>2149    | TTCTTTTGAATTATCCATAGTGGTAAAACTATCCATGAAACAAGGAGGGAACAGCAGCA            |
| PF3D7_1148640,<br>2335    | TTTTTATGAATTATCCGAAGTGGTAAAACTATCCTTGAAAAAAGGAGGGAACGGAGCAT            |
| PF3D7_1371300,<br>2337    | TTTTTATGAATTATCCGAAGTGGTAAAACTATCCTTGAAAAAAGGAGGGAACGGAGCAT            |
|                           | **    **      *****      *****      *****      *****      *****      * |
| PF3D7_0532000,28S<br>2080 | TAACCTG-----GTTTCTTCTGATTCCATTTTGCTTTGCTTAT                            |
| PF3D7_0726000,28S<br>2078 | TAACCTG-----GTTTCTTCTGATTCCATTTTGCTTTGCTTAT                            |
| PF3D7_0112700,<br>2196    | ATTATA-----TAATTTTTGGGGTTCTTTGAATTCCTTATTATTTTGAAT                     |
| PF3D7_1148640,<br>2395    | ATACAGAAGGGAATTTAATTATTTTTTTTTTTTGGAGTTACCTTCTTATGTGAAATACTCT          |
| PF3D7_1371300,<br>2397    | ATACAGAAGGGAATTTAATTATTTTTTTTTTTTGGAGTTACCTTCTTATGTGAAATACTCT          |
|                           | **      *    *    *      *                                             |
| PF3D7_0532000,28S<br>2140 | ACTCTTAATACTTGTATGAGCGTACCAACAACCGCATCAGGTCTCCAAGGTTAACAGCCT           |
| PF3D7_0726000,28S<br>2138 | ACTCTTAATACTTGTATGAGCGTACCAACAACCGCATCAGGTCTCCAAGGTTAACAGCCT           |



|                           |                                                                 |
|---------------------------|-----------------------------------------------------------------|
| PF3D7_0112700,<br>2256    | ATTCTTAATACTTGTACGAGCGTACCAATAACCGCATCAGGTCTCCAAGGTTAGTAGCCT    |
| PF3D7_1148640,<br>2455    | TATATTCAATCAATAATGAGTGTACCAATAACCGCATCAGGTCTCCAAGGTTAGTAGCCT    |
| PF3D7_1371300,<br>2457    | TATATTCAATCAATAATGAGTGTACCAATAACCGCATCAGGTCTCCAAGGTTAGTAGCCT    |
|                           | * * * * * * * * * * * * * * * * * * * * * * * * * * * * * * * * |
| PF3D7_0532000,28S<br>2200 | CTGGTTAAATAGAAAAAGTAGGTAAGGGAAGTCGGCAAAATAGATCCGTAACCTCGGGA     |
| PF3D7_0726000,28S<br>2198 | CTGGTTAAATAGAAAAAGTAGGTAAGGGAAGTCGGCAAAATAGATCCGTAACCTCGGGA     |
| PF3D7_0112700,<br>2316    | CTGGTTAAATAGAAAAAGTAGGTAAGGGAAGTCGGCAAAATAGATCCGTAACCTCGGGA     |
| PF3D7_1148640,<br>2515    | CTGGTTAAATAGAAAAAGTAGGTAAGGGAAGTCGGCAAAATAGATCCGTAACCTCGGGA     |
| PF3D7_1371300,<br>2517    | CTGGTTAAATAGAAAAAGTAGGTAAGGGAAGTCGGCAAAATAGATCCGTAACCTCGGGA     |
|                           | *****                                                           |
| PF3D7_0532000,28S<br>2260 | AAAGGATTGGCTCTGAGGACATTAGAAAAGAGAAGAAAAAAGAGGGTCGAAAATAAAAT     |
| PF3D7_0726000,28S<br>2258 | AAAGGATTGGCTCTGAGGACATTAGAAAAGAGAAGAAAAAAGAGGGTCGAAAATAAAAT     |
| PF3D7_0112700,<br>2375    | AAAGGATTGGCTCTGAGGACATTAGAAAAGAGAAGAAAAAAGAGGGT-TGAGAATAAAA     |
| PF3D7_1148640,<br>2575    | AAAGGATTGGCTCTGAGGACATTAGAAAAGAGAAGAAAAAAGAGGGGTTGAAAATAAAA     |
| PF3D7_1371300,<br>2577    | AAAGGATTGGCTCTGAGGACATTAGAAAAGAGAAGAAAAAAGAGGGGTTGAAAATAAAA     |
|                           | ***** * * *                                                     |
| PF3D7_0532000,28S<br>2314 | TGCAGTCTTTATTTGCTTTTCTTT--CGATTGCTTGTAATCTGCTTT-TTCT---TTTT     |
| PF3D7_0726000,28S<br>2312 | TGCAGTCTTTATTTGCTTTTCTTT--CGATTGCTTGTAATCTGCTTT-TTCT---TTTT     |
| PF3D7_0112700,<br>2434    | TTGCAGATTTATTTGCTTTTCTCTCT-GATTGCTTGTAATTTTCTTTTCTTTTCTTT       |
| PF3D7_1148640,<br>2635    | TTACAGATTTATTTGCTTTTATCTTTTCGATTGGTTGTAAATTTGTTTTTCGTTTTTCTT    |
| PF3D7_1371300,<br>2637    | TTACAGATTTATTTGCTTTTATCTTTTCGATTGGTTGTAAATTTGTTTTTCGTTTTTCTT    |
|                           | * * * * * * * * * * * * * * * * * * * * * * * * * * * * * * *   |
| PF3D7_0532000,28S<br>2371 | CTTCTTTCTTTTTTCTCCCCCTCTTTTCGCCTTCACTTTATTGTAATTTTATTACT---     |
| PF3D7_0726000,28S<br>2369 | CTTCTTTCTTTTTTCTCCCCCTCTTTTCGCCTTCACTTTATTGTAATTTTATTACT---     |
| PF3D7_0112700,<br>2494    | CTTTTCTTTTTTTTCTGTCCCTCTTTTCGCTTCATTTTATTGTAATTTTGTACTTT        |
| PF3D7_1148640,<br>2693    | C--TTTGTTTTTATCTGTTCCTGTTTTTCGCTTCATTTTATTGTAATTTTAGTTACTTA     |
| PF3D7_1371300,<br>2695    | C--TTTGTTTTTATCTGTTCCTGTTTTTCGCTTCATTTTATTGTAATTTTAGTTACTTA     |
|                           | * * * * * * * * * * * * * * * * * * * * * * * * * * * * * * *   |
| PF3D7_0532000,28S<br>2430 | -TTAATTTGATACCTATAATGTTAACTCAGAACTGAAACGGACAAGGGGAATCCGACTGT    |
| PF3D7_0726000,28S<br>2428 | -TTAATTTGATACCTATAATGTTAACTCAGAACTGAAACGGACAAGGGGAATCCGACTGT    |
| PF3D7_0112700,<br>2553    | A-ATTTGATACATATAATGTTAACTCAGAACTGAAACGGACAAGGGGAATCCGACTGT      |

|                           |                                                               |
|---------------------------|---------------------------------------------------------------|
| PF3D7_1148640,<br>2753    | AATTTTTTGATATATATAATGTAACTCAGAACTGAAACGGACAAGGGGAATCCGACTGT   |
| PF3D7_1371300,<br>2755    | AATTTTTTGATATATATAATGTAACTCAGAACTGAAACGGACAAGGGGAATCCGACTGT   |
|                           | * * * *****                                                   |
| PF3D7_0532000,28S<br>2490 | TTAATTAAAACATAGCATTGTGAAAAGCCACAACCTGGTATTAACACAATGTGATTTCTGC |
| PF3D7_0726000,28S<br>2488 | TTAATTAAAACATAGCATTGTGAAAAGCCACAACCTGGTATTAACACAATGTGATTTCTGC |
| PF3D7_0112700,<br>2613    | TTAATTAAAACATAGCATTGTGAAAAGCCATAACTGGTATTAACACAATGTGATTTCTGC  |
| PF3D7_1148640,<br>2813    | TTAATTAAAACATAGCATTGTGAAAAGCCATAACTGGTATTAACACAATGTGATTTCTGC  |
| PF3D7_1371300,<br>2815    | TTAATTAAAACATAGCATTGTGAAAAGCCATAACTGGTATTAACACAATGTGATTTCTGC  |
|                           | ***** ** *****                                                |
| PF3D7_0532000,28S<br>2548 | CCAGTGCTTTGAATGTCAACTTGATGAA--ATTCAATCAAGCGCAGGTAAACGGCGGGAG  |
| PF3D7_0726000,28S<br>2546 | CCAGTGCTTTGAATGTCAACTTGATGAA--ATTCAATCAAGCGCAGGTAAACGGCGGGAG  |
| PF3D7_0112700,<br>2671    | CCAGTGCTTTGAATGTCAAATTGATGAA--ATTTAATTAAGCGCAGGTAAACGGCGGGAG  |
| PF3D7_1148640,<br>2873    | CCAGTGCTTTGAATGTTAAGTTGATGAAAAATTCAATTAAGCGCAGGTAAACGGCGGGAG  |
| PF3D7_1371300,<br>2875    | CCAGTGCTTTGAATGTTAAGTTGATGAAAAATTCAATTAAGCGCAGGTAAACGGCGGGAG  |
|                           | ***** ** *****                                                |
| PF3D7_0532000,28S<br>2608 | TAACTATGACTCTCTTAAGGTAGCCAAATGCCTCGTCATCTAATTAGTGACGCGCATGAA  |
| PF3D7_0726000,28S<br>2606 | TAACTATGACTCTCTTAAGGTAGCCAAATGCCTCGTCATCTAATTAGTGACGCGCATGAA  |
| PF3D7_0112700,<br>2731    | TAACTATGACTCTCTTAAGGTAGCCAAATGCCTCGTCATCTAATTAGTGACGCGCATGAA  |
| PF3D7_1148640,<br>2933    | TAACTATGACTCTCTTAAGGTAGCCAAATGCCTCGTCATCTAATTAGTGACGCGCATGAA  |
| PF3D7_1371300,<br>2935    | TAACTATGACTCTCTTAAGGTAGCCAAATGCCTCGTCATCTAATTAGTGACGCGCATGAA  |
|                           | *****                                                         |
| PF3D7_0532000,28S<br>2668 | TGGATTAACGAGATTCCCACTGTCCCTACTTGCTATCTAGCGAAACCACAGCCAAGGGAA  |
| PF3D7_0726000,28S<br>2666 | TGGATTAACGAGATTCCCACTGTCCCTACTTGCTATCTAGCGAAACCACAGCCAAGGGAA  |
| PF3D7_0112700,<br>2791    | TGGATTAACGAGATTCCCACTGTCCCTACTTGCTATCTAGCGAAACCACAGCCAAGGGAA  |
| PF3D7_1148640,<br>2993    | TGGATTAACGAGATTCCCACTGTCCCTACTTGCTATCTAGCGAAACCACAGCCAAGGGAA  |
| PF3D7_1371300,<br>2995    | TGGATTAACGAGATTCCCACTGTCCCTACTTGCTATCTAGCGAAACCACAGCCAAGGGAA  |
|                           | *****                                                         |
| PF3D7_0532000,28S<br>2728 | CGGGCTTGGCAAAATCAGCGGGGAAAGAAGACCCTGTTGAGCTTTACTCTAGTCTGGCTT  |
| PF3D7_0726000,28S<br>2726 | CGGGCTTGGCAAAATCAGCGGGGAAAGAAGACCCTGTTGAGCTTTACTCTAGTCTGGCTT  |
| PF3D7_0112700,<br>2851    | CGGGCTTGGCAAAATCAGCGGGGAAAGAAGACCCTGTTGAGCTTTACTCTAGTCTGACTT  |
| PF3D7_1148640,<br>3053    | CGGGCTTGGCAAAATCAGCGGGGAAAGAAGACCCTGTTGAGCTTTACTCTAGTCTGGCTT  |

|                           |                                                                                      |
|---------------------------|--------------------------------------------------------------------------------------|
| PF3D7_1371300,<br>3055    | CGGGCTTGGCAAAATCAGCGGGGAAAGAAGACCCTGTTGAGCTTTACTCTAGTCTGGCTT<br>*****                |
| PF3D7_0532000,28S<br>2775 | TGTGAAACGACTTAAGAGGTGTAGCATAAGTGGGAGTAGAACTGAA-----                                  |
| PF3D7_0726000,28S<br>2773 | TGTGAAACGACTTAAGAGGTGTAGCATAAGTGGGAGTAGAACTGAA-----                                  |
| PF3D7_0112700,<br>2901    | TGTAAAACGACTTAAAAGGTGTAGATATAAGTGGGAGTAGGAAAATGAAA-----                              |
| PF3D7_1148640,<br>3113    | TGTGAAACGACTTAGAAGGTGTAGTATAAGTGGGAGTACAAAGAAGGGATCGAAAATTAA                         |
| PF3D7_1371300,<br>3115    | TGTGAAACGACTTAGAAGGTGTAGTATAAGTGGGAGTACAAAGAAGGGATCGAAACTAA<br>*** ***** * ** *      |
| PF3D7_0532000,28S<br>2825 | -----ATATGTTTTTACGACAGTGAAATACCACTACTTTTAAAGTTGTTTTACTT                              |
| PF3D7_0726000,28S<br>2823 | -----ATATGTTTTTACGACAGTGAAATACCACTACTTTTAAAGTTGTTTTACTT                              |
| PF3D7_0112700,<br>2951    | -----TACGTTTTTTACAATAGTGAAATACCACTACTTTTAAAGTTGTTTTACTA                              |
| PF3D7_1148640,<br>3173    | TTCGATCTTTATGTTTTTGTACACAAATGAAATACCACTACTTTTACAGTTGTTTTACTT                         |
| PF3D7_1371300,<br>3175    | TTCGATCTTTATGTTTTTGTACACAAATGAAATACCACTACTTTTACAGTTGTTTTACTT<br>*** ** * ***** ***** |
| PF3D7_0532000,28S<br>2866 | ATCCATTTATAGGGAAATATATTATGCTTTATCCTTCGGGA-----                                       |
| PF3D7_0726000,28S<br>2864 | ATCCATTTATAGGGAAATATATTATGCTTTATCCTTCGGGA-----                                       |
| PF3D7_0112700,<br>3011    | ATCCATTGATAGGGATATATAAACTTATAAATAATTTTATTTTAAGTTACTTTTGAAT                           |
| PF3D7_1148640,<br>3214    | ATCTATTAATAGGGAAATATATTATGCTTTAATTCTTTGTG-----                                       |
| PF3D7_1371300,<br>3216    | ATCTATTAATAGGGAAATATATTATGCTTTAATTCTTTGTG-----<br>*** ** ***** * * *                 |
| PF3D7_0532000,28S<br>2901 | -----AGGCATTCTGATATTATTTGAATTTTAAAGAACT                                              |
| PF3D7_0726000,28S<br>2899 | -----AGGCATTCTGATATTATTTGAATTTTAAAGAACT                                              |
| PF3D7_0112700,<br>3071    | TTAAGATATGTGTGCATTTATATCTATTAAATCCCATTTGTATATATATATATATATA                           |
| PF3D7_1148640,<br>3252    | -----AA-----AAAGGCATTCTGATATTAT-TTGAATTTTAAAGAAAC                                    |
| PF3D7_1371300,<br>3254    | -----AA-----AAAGGCATTCTGATATTAT-TTGAATTTTAAAGAAAC<br>* * ** * * * * *                |
| PF3D7_0532000,28S<br>2961 | TGTTTCTTATCTTTCTCCCAATTTCTATGGAGACATAGCCAGGTGGGGAGTTTGACTGGG                         |
| PF3D7_0726000,28S<br>2959 | TGTTTCTTATCTTTCTCCCAATTTCTATGGAGACATAGCCAGGTGGGGAGTTTGACTGGG                         |
| PF3D7_0112700,<br>3131    | TATATGTGTATAATACGATTTTTTTTATGGAGACATAGTTAGGTGGGGAGTTTGACTGGG                         |
| PF3D7_1148640,<br>3312    | TTGTTTCTTATATTTCTCCCATTTCTATGGAGACATAGCCAGGTGGGGAGTTTGACTGGG                         |
| PF3D7_1371300,<br>3314    | TTGTTTCTTATATTTCTCCCATTTCTATGGAGACATAGCCAGGTGGGGAGTTTGACTGGG<br>* * * ***** *****    |

|                           |                                                               |
|---------------------------|---------------------------------------------------------------|
| PF3D7_0532000,28S<br>3021 | GCGGTACATCTGTTAAATATTAACGCAGATGTCCAAAGACAAGCTCAAAGAGAACAGAAA  |
| PF3D7_0726000,28S<br>3019 | GCGGTACATCTGTTAAATATTAACGCAGATGTCCAAAGACAAGCTCAAAGAGAACAGAAA  |
| PF3D7_0112700,<br>3191    | GCGGTACATCTGTTAAAAAATAACGCAGATGTCCAAAGACAAGCTCAAAGAGAACAGAAA  |
| PF3D7_1148640,<br>3372    | GCGGTACATCTGTTAAAAAATAACGCAGATGTCCAAAGACAAGCTCAATGAGAACAGAAA  |
| PF3D7_1371300,<br>3374    | GCGGTACATCTGTTAAAAAATAACGCAGATGTCCAAAGACAAGCTCAATGAGAACAGAAA  |
|                           | ***** * *****                                                 |
| PF3D7_0532000,28S<br>3081 | TCTCTGTAGACTAAAAGGGGAAAAGCTTGTTTGATTCTATTTTCAGAACAAAGTAGAAA   |
| PF3D7_0726000,28S<br>3079 | TCTCTGTAGACTAAAAGGGGAAAAGCTTGTTTGATTCTATTTTCAGAACAAAGTAGAAA   |
| PF3D7_0112700,<br>3251    | TCTCTGTAGACTAAAAGGGGAAAAGCTTGTTTGATTTTACTTTCAGAAATGAGTAGAAA   |
| PF3D7_1148640,<br>3432    | TCTCGTGTAGACTAAAAGGGGAAAAGCTTGTTTGATTCTATTTTCAGAAAGAATAGAAA   |
| PF3D7_1371300,<br>3434    | TCTCGTGTAGACTAAAAGGGGAAAAGCTTGTTTGATTCTATTTTCAGAAAGAATAGAAA   |
|                           | **** ***** ** ***** *                                         |
| PF3D7_0532000,28S<br>3138 | ACGTGAAAGCGTGGCCTATCGATCCTTTTATATTTGCAAAATGACGTAAAT---TACTTAC |
| PF3D7_0726000,28S<br>3136 | ACGTGAAAGCGTGGCCTATCGATCCTTTTATATTTGCAAAATGACGTAAAT---TACTTAC |
| PF3D7_0112700,<br>3311    | ACGTGAAAGCGTGGCCTATCGATCCTTTTATATTTGCAAAATGACGTAATAAATTACTTAC |
| PF3D7_1148640,<br>3489    | ACGTGAAAGCGTGGCCTATCGATCCTTTATTTTGGCAAAATGTATTAATAACA---TTCT  |
| PF3D7_1371300,<br>3491    | ACGTGAAAGCGTGGCCTATCGATCCTTTATTTTGGCAAAATGTATTAATAACA---TTCT  |
|                           | ***** ***** *** **                                            |
| PF3D7_0532000,28S<br>3198 | TACTGTGCATATAGAGGTGTCTGAAAAGTTACCACAGGGATAACTGGCTTGTGGCTGCCA  |
| PF3D7_0726000,28S<br>3196 | TACTGTGCATATAGAGGTGTCTGAAAAGTTACCACAGGGATAACTGGCTTGTGGCTGCCA  |
| PF3D7_0112700,<br>3371    | TACTGTGCATATAGAGGTGTCTGAAAAGTTACCACAGGGATAACTGGCTTGTGGCTGCCA  |
| PF3D7_1148640,<br>3549    | GACTGTGCATATAAAGGTGTCTGAAAAGTTACCACAGGGATAACTGGCTTGTGGCTGCCA  |
| PF3D7_1371300,<br>3551    | GACTGTGCATATAAAGGTGTCTGAAAAGTTACCACAGGGATAACTGGCTTGTGGCTGCCA  |
|                           | *****                                                         |
| PF3D7_0532000,28S<br>3258 | AGCGCTCCTAGCGACGTAGCTTTTTGATCCTTCGATGTCGGCTCTTCCTATCATTTGGGAC |
| PF3D7_0726000,28S<br>3256 | AGCGCTCCTAGCGACGTAGCTTTTTGATCCTTCGATGTCGGCTCTTCCTATCATTTGGGAC |
| PF3D7_0112700,<br>3431    | AGCGCTCCTAGCGACGTAGCTTTTTGATCCTTCGATGTCGGCTCTTCCTATCATTTGGGAC |
| PF3D7_1148640,<br>3609    | AGCGCTCCTAGCGACGTAGCTTTTTGATCCTTCGATGTCGGCTCTTCCTATCATTTGGGAC |
| PF3D7_1371300,<br>3611    | AGCGCTCCTAGCGACGTAGCTTTTTGATCCTTCGATGTCGGCTCTTCCTATCATTTGGGAC |
|                           | *****                                                         |
| PF3D7_0532000,28S<br>3318 | GCAGAAGTCTCAAAGTGTCGGATTGTTACCCGCTAATAGGGAACGTGAGCTGGGTTTAG   |

|                           |                                                               |
|---------------------------|---------------------------------------------------------------|
| PF3D7_0726000,28S<br>3316 | GCAGAAGTCTCAAAGTGTCTGGATTGTTTACCCGCTAATAGGGAACGTGAGCTGGGTTTAG |
| PF3D7_0112700,<br>3491    | GCAGAAGTCTCAAAGTGTCTGGATTGTTTACCCGCTAATAGGGAACGTGAGCTGGGTTTAG |
| PF3D7_1148640,<br>3669    | GCAGAAGTCTCAAAGTGTCTGGATTGTTTACCCGCTAATAGGGAACGTGAGCTGGGTTTAG |
| PF3D7_1371300,<br>3671    | GCAGAAGTCTCAAAGTGTCTGGATTGTTTACCCGCTAATAGGGAACGTGAGCTGGGTTTAG |
|                           | *****                                                         |
| PF3D7_0532000,28S<br>3373 | ACCGTCGTGAGACAGGTTAGTTTTACCCTACTGATGAATTTTATTATATTTTTTA-----  |
| PF3D7_0726000,28S<br>3371 | ACCGTCGTGAGACAGGTTAGTTTTACCCTACTGATGAATTTTATTATATTTTTTA-----  |
| PF3D7_0112700,<br>3549    | ACCGTCGTGAGACAGGTTAGTTTTACCCTACTGATGAATAATATTATATATTTTTTT--A  |
| PF3D7_1148640,<br>3729    | ACCGTCGTGAGACAGGTTAGTTTTACCCTACTGATGAATTTTATTATATTTTTTTATATAT |
| PF3D7_1371300,<br>3731    | ACCGTCGTGAGACAGGTTAGTTTTACCCTACTGATGAATTTTATTATATTTTTTTATATAT |
|                           | ***** * *                                                     |
| PF3D7_0532000,28S<br>3432 | -TATATACATATAGTATTGTGACAGTAATCCAACCTGGTACGAGAGGATTAGTTGGTTCA  |
| PF3D7_0726000,28S<br>3430 | -TATATACATATAGTATTGTGACAGTAATCCAACCTGGTACGAGAGGATTAGTTGGTTCA  |
| PF3D7_0112700,<br>3609    | TATACAATATATAGTATTGTGACAGTAATCCAACCTGGTACGAGAGGATTAGTTGGTTCA  |
| PF3D7_1148640,<br>3789    | ATATATACATATAATATTGTGACAGTAATCCAACCTGGTACGAGAGGATTAGTTGGTTCA  |
| PF3D7_1371300,<br>3791    | ATATATACATATAGTATTGTGACAGTAATCCAACCTGGTACGAGAGGATTAGTTGGTTCA  |
|                           | * *****                                                       |
| PF3D7_0532000,28S<br>3492 | GACAATTGGTACAGCAATTGGTTGACAAACCAGTGTTGCGAAGCTAAGTCTGTTGGATAA  |
| PF3D7_0726000,28S<br>3490 | GACAATTGGTACAGCAATTGGTTGACAAACCAGTGTTGCGAAGCTAAGTCTGTTGGATAA  |
| PF3D7_0112700,<br>3669    | GACAATTGGTACAGCAATTGGTTGATAAACCAGTGTTGCGAAGCTAAGTCTGTTGGATAA  |
| PF3D7_1148640,<br>3849    | GACAATTGGTACAGCAATTGGTTGATAAGCCAGTGTTGCGAAGCTAAGTCTGTTGGATAA  |
| PF3D7_1371300,<br>3851    | GACAATTGGTACAGCAATTGGTTGATAAGCCAGTGTTGCGAAGCTAAGTCTGTTGGATAA  |
|                           | ***** ** *****                                                |
| PF3D7_0532000,28S<br>3552 | TGGCTGAACGCCTCTTAAGCCAGAAACCATGCTGATTAAACAATACTATTTTCGTTCTTTT |
| PF3D7_0726000,28S<br>3550 | TGGCTGAACGCCTCTTAAGCCAGAAACCATGCTGATTAAACAATACTATTTTCGTTCTTTT |
| PF3D7_0112700,<br>3729    | TGGCTGAACGCCTCTTAAGCCAGAACCCATGCTGATTAGACAATTCTAAATTTGATCTTT  |
| PF3D7_1148640,<br>3909    | TGACTGAACGCCTCTTAAGTCAGAACCCATACTGATTAGACAATTTTATATTGTTCTTTT  |
| PF3D7_1371300,<br>3911    | TGACTGAACGCCTCTTAAGTCAGAACCCATACTGATTAGACAATTTTATATTGTACTTTT  |
|                           | ** ***** * * * *                                              |
| PF3D7_0532000,28S<br>3583 | TTGTTTCTTTTTTTACTGC-----TAATGTAAAAGA                          |
| PF3D7_0726000,28S<br>3581 | TTGTTTCCTTTTTTTACTGC-----TAATGTAAAAGA                         |

|                           |                                                               |
|---------------------------|---------------------------------------------------------------|
| PF3D7_0112700,<br>3789    | TTGTTAAACGATAAAAAATTATATATATATTTTTTTTATCTTTACTGCATAATGTAAAAGA |
| PF3D7_1148640,<br>3959    | TGTTTAAATATAAAAAATATTATTA-----TTTTTTTTTACTGCTAATGTAAATGA      |
| PF3D7_1371300,<br>3961    | TGTTTAAATATAAAAAATATTATTA-----TTTTTTTTTACTGCTAATGTAAATGA      |
|                           | *   *   *   *   *   *   *                                     |
| PF3D7_0532000,28S<br>3634 | GAAATTATATATGTACCTTTTTTTTGGTACATA-----AATAATCCTATCACCTTTT--   |
| PF3D7_0726000,28S<br>3632 | GAAATTATATATGTACCTTTTTTTTGGTACATA-----AATAATCCTATCACCTTTT--   |
| PF3D7_0112700,<br>3849    | GAAATTATACATATATATATATATATATATTAGAAAAGAAAAAATGATGTAATTAATTAT  |
| PF3D7_1148640,<br>3999    | GAAATTATACATATATTAGAAAAA-----AATGTAATTAATTGT                  |
| PF3D7_1371300,<br>4001    | GAAATTATACATATATTAGAAAAA-----AATGTAATTAATTGT                  |
|                           | *****   *   *   *   *                                         |
| PF3D7_0532000,28S<br>3665 | TC--GTGAGCTGTGAGCTGTGAGCTAGGCAATA-----                        |
| PF3D7_0726000,28S<br>3663 | TC--GTGAGCTGTGAGCTGTGAGCTAGGCAATA-----                        |
| PF3D7_0112700,<br>3909    | TATTATTATTTTTTTTTTTTTTTTAGTATTAATATATAATTATGAATATATAAATAATCCT |
| PF3D7_1148640,<br>4032    | TT-----TTTTTTCGCTTTTATAA-----TATATCAATAATCCT                  |
| PF3D7_1371300,<br>4034    | TT-----TTTTTTCGCTTTTATAA-----TATATCAATAATCCT                  |
|                           | *   *   *   *                                                 |
| PF3D7_0532000,28S<br>3665 | -----                                                         |
| PF3D7_0726000,28S<br>3663 | -----                                                         |
| PF3D7_0112700,<br>3969    | ATATCTTTATATAAAAAATTAAATTTTAAATTTTATTAGAATTTTTTTTTTTATATATAT  |
| PF3D7_1148640,<br>4084    | ATCTTTTATATATATGTATGT-----GTATACATATATATATATGTATATATAAAT      |
| PF3D7_1371300,<br>4086    | ATCTTTTATATATATGTATGT-----GTATACATATATATATATGTATATATAAAT      |
| PF3D7_0532000,28S<br>3719 | -----G TTC-TTTAACAACAAAAAGAATTGCACAACTGTAGACGACTTTTTTGCCTCA   |
| PF3D7_0726000,28S<br>3717 | -----G TTC-TTTAACAACAAAAAGAATTGCACAACTGTAGACGACTTTTTTGCCTCA   |
| PF3D7_0112700,<br>4029    | AGATTGTAATTTAACAACAAAAAGTATTAAGCCCAAATCGTAGACGACTTTTCTGTCTCA  |
| PF3D7_1148640,<br>4142    | AGATTGTAATTTAACAACAAAAAGTGT--TAAGCATATTGTAGACGACTTTTCAGTCTCA  |
| PF3D7_1371300,<br>4144    | AGATTGTAATTTAACAACAAAAAGTGT--TAAGCATATTGTAGACGACTTTTCAGTCTCA  |
|                           | *   *   *   *   *   *   *   *   *                             |
| PF3D7_0532000,28S<br>3779 | GGGTGCTGTAAACATGAAAGTAACTTTGTTTTACGATCTGTTGAGGCTTATCCCTAGTG   |
| PF3D7_0726000,28S<br>3777 | GGGTGCTGTAAACATGAAAGTAACTTTGTTTTACGATCTGTTGAGGCTTATCCCTAGTG   |
| PF3D7_0112700,<br>4089    | GAGTACTGTAAACATGAGAGTAACTTTGTTTTACGATCTGTTGAGGTTATCTCTTG      |

|                |                                                            |
|----------------|------------------------------------------------------------|
| PF3D7_1148640, | GAGTGCTGTAAACATGAGAGTAACTAAGTTTACGATCTGTTGAGGCTTATCTCTTGTG |
| 4202           |                                                            |
| PF3D7_1371300, | GAGTGCTGTAAACATGAGAGTAACTAAGTTTACGATCTGTTGAGGCTTATCTCTTGTG |
| 4204           |                                                            |

\* \* \* \* \*

|                   |                 |      |
|-------------------|-----------------|------|
| PF3D7_0532000,28S | GTAAAGTGTTT---- | 3790 |
| PF3D7_0726000,28S | GTAAAGTGTTT---- | 3788 |
| PF3D7_0112700,    | ACATTGAGCTAATTT | 4104 |
| PF3D7_1148640,    | ACA-----        | 4205 |
| PF3D7_1371300,    | ACAATTAGCTA---- | 4215 |

\*
