# Supplementary material for: Detection of Developmental Asexual Stage-Specific RNA Editing Events in Plasmodium falciparum 3D7 Malaria Parasite
Source: MDPI journal article supplement (doi:10.3390/microorganisms12010137), 2024-01-10
Supplement: s1 [file s1]

## 5 amino acids change in PF3D7\_0216900 due to RNA editing

CLUSTAL O(1.2.4) multiple sequence alignment

|                   |                                                                   |     |
|-------------------|-------------------------------------------------------------------|-----|
| Unedited          | MEEKKKINNKSNSRVSNDDTNKEKRKKLKPIQVRRSIKDIIISHNPYDYIYNYKGNDIDI      | 60  |
| Edited            | MEEKKKINNKSNSRVSNDDTNKEKRKKLKPIQVRRSIKDIIISHNPYDYIYNYKGNDIDI      | 60  |
| *****             |                                                                   |     |
| Unedited          | FDINKHDKIVKDRTSEIEENSNIIFIENEILDNNEMLLRKELNELINKDDLSEDMKNDIKA     | 120 |
| Edited            | FDINKHDKIVKDRTSEIEENSNIIFIENEILDNNEMLLRKELSELINKDDLSEDMKNDIKA     | 120 |
| *****             |                                                                   |     |
| Unedited          | LYIEVQEMYLILKNDIKNNIPSSDEIICKLYLADDQKDKSTNIIWKRF CFYKLLSDKLN DL   | 180 |
| Edited            | LYIEVQEMYLILKNDIKNNIPSSDEIICKLYLADDQKDKSTNMIWKRI CFYKLLSDKLN DL   | 180 |
| ***** : * * * * * |                                                                   |     |
| Unedited          | HISTISSYRHTY LKTIYIWYKKNKLLFN TDNKEVFGGNNIVGEINEVDEKNESDEKNE      | 240 |
| Edited            | HISTISSYRHTCLKTIYIWYKKNKLLFN TDNKEVFGGNNIVGEINEVDEKNESDEKNE       | 240 |
| *****             |                                                                   |     |
| Unedited          | VDEKNEGGEKNVDEKNEGGEKNVDEKNEGDEKNITNQNEI IKNKDPLNCHTKKEET EKEM    | 300 |
| Edited            | VDEKNEGGEKNVDEKNEVGEKNVDEKNEGDEKNITNQNEI IKNKDPLNCHTKKEET EKEM    | 300 |
| *****             |                                                                   |     |
| Unedited          | KKDYAKKISHNFDETLQEEMNKIKKEHEIKENDINLLVYN EEPHDVLNKYTFPNDVFLLN     | 360 |
| Edited            | KKDYAKKISHNFDETLQEEMNKIKKEHEIKENDINLLVYN EEPHDVLNKYTFPNDVFLLN     | 360 |
| *****             |                                                                   |     |
| Unedited          | NTKISDPKNIKNVKEEQNVVSN DLNVLLLRNDKDEEDKYAKGICEHVS LDI FINNND AFNI | 420 |
| Edited            | NTKISDPKNIKNVKEEQNVVSN DLNVLLLRNDKDEEDKYAKGICEHVS LDI FINNND AFNI | 420 |
| *****             |                                                                   |     |
| Unedited          | NTNDAFNINTN DTFNINTNDAFNINTNDAFNINTNDAFNINTN DTFNINTN DTFN IKTND  | 480 |
| Edited            | NTNDAFNINTN DTFNINTNDAFNINTNDAFNINTNDAFNINTN DTFNINTN DTFN IKTND  | 480 |
| *****             |                                                                   |     |
| Unedited          | TLSINNYNLDIKEEHKNVPIPLHTN KIKELEEEIKKQKLLIKKKEIEIINSPIG IKFKDI    | 540 |
| Edited            | TLSINNYNLDIKEEHKNVPIPLHTN KIKELEEEIKKQKLLIKKKEIEIINSPIG IKFKDI    | 540 |
| *****             |                                                                   |     |
| Unedited          | FGKFQDINN                                                         | 549 |
| Edited            | FGKFQDINN                                                         | 549 |
| *****             |                                                                   |     |
