# Supplementary material for: Detection of Developmental Asexual Stage-Specific RNA Editing Events in Plasmodium falciparum 3D7 Malaria Parasite
Source: MDPI journal article supplement (doi:10.3390/microorganisms12010137), 2024-01-10
Supplement: s1 [file s1]

Supplementary Table S1. Selected genes for our RNA editing study in *Plasmodium falciparum* 3D7

| Genes ID       | Genes Name                                    | Oligonucleotides sequences                                                              | Product size |
|----------------|-----------------------------------------------|-----------------------------------------------------------------------------------------|--------------|
| PF3D7_0532000  | 28S rRNA                                      |                                                                                         |              |
| PF3D7_0112700  | 28S rRNA                                      | 3D7700 F 596; ACAAGGGGAATCCGACTGTT<br>3D7700 R 596; CCAGTCAAACCTCCCCACCT                |              |
| PF3D7_1148640  | 28S rRNA                                      |                                                                                         |              |
| PF3D7_1371300  | 28S rRNA                                      |                                                                                         |              |
| PF3D7_0801100  | 28S rRNA                                      |                                                                                         |              |
| PF3D7_0216900  | Protein of unknown function                   | CPP 900F; CAACAAGTCAAACAGTCGAGTTTC<br>CPP 900 R; CCCCCAAACACTTCTTTGTT                   | 600 bp       |
| PF3D7_0501200  | Parasite-infected erythrocyte surface protein | PIPES FW; TTAATTTTATAGGAACATTTTGGAA<br>PIPES Rev; TTCATCATGATTGGCGTGT                   | 954 bp       |
| PF3D7_1227200, | potassium channel K1                          | Kchanl1Fw; TCTGATGGAGGAAGAAAACGA<br>Kchanl1Rev; GCAGAATCTTTCATCATCAAATCA                | 557 bp<br>ND |
| PF3D7_1149000; | antigen 332, DBL-like protein                 | FP1 antigen 332; GGAGACCGAACAAACAGAGG<br><br>RP1 antigen 332;<br>TGTTCTCCGGAATATCATCGGT | 750bp<br>ND  |
| PF3D7_0815200  | importin subunit beta                         | Imp B fw; GGACCTTATCTATGGCATCAGC<br>Imp B Re; CAGGCAGCTGTATCACGAAC                      | 260 bp<br>ND |

ND= RNA editing not detected
