# Supplementary material for: Detection of Developmental Asexual Stage-Specific RNA Editing Events in Plasmodium falciparum 3D7 Malaria Parasite
Source: Microorganisms. 2024 Jan 10;12(1):137. doi: 10.3390/microorganisms12010137 (PMC10819399; doi:10.3390/microorganisms12010137)
Supplement: Supplementary file 1 [file microorganisms-12-00137-s001.zip]

Archive with 4 entries (4 files):
- Supplement Figures.pdf
- Supplementary File S1.pdf
- Supplementary File S2.pdf
- Supplementary Table S1.pdf
